# Supplementary material
Source: MDPI journal article supplement (https://www.mdpi.com/2071-1050/12/18/7820)
Supplement: s1 [file s1]

## Supplementary Material: Questionnaire

### Section I: Foundation Activities & SDGs

Q1 The foundation's funding activities intend to have a positive **impact** in the following areas: (tick all that apply)

- Climate change / destruction of nature (1)
- Large scale conflict / wars (2)
- Inequality (income, discrimination) (3)
- Poverty (4)
- Religious conflicts (5)
- Government accountability and transparency / corruption (6)
- Food and water security (7)
- Education (8)
- Safety / security / well-being (9)
- Economic opportunity and employment (10)

In 2015, all UN Member States adopted the **2030 Agenda for Sustainable Development**. The 17 Sustainable Development Goals (SDGs) are an urgent call for action by developed and developing countries *“to achieve a better and more sustainable future for all”*.

Q2 The **SDGs** function as a **point of reference** for (yes 1, no 2, don't know 3)

- the corporate foundation's activities (1)
- the founding company's business activities (2)
- the company's other charitable activities outside the foundation (3)

Q3 To the following **SDGs** is **contributed** by: (tick all that apply)

- the corporate foundation's activities
- the founding company's business activities
- the company's other charitable activities outside the foundation

1. No Poverty (1)
2. Zero Hunger (2)
3. Good Health and Well-being (3)
4. Quality Education (4)
5. Gender Equality (5)
6. Clean Water and Sanitation (6)
7. Affordable and Clean Energy (7)
8. Decent Work and Economic Growth (8)
9. Industry, Innovation and Infrastructure (9)
10. Reduced Inequalities (10)
11. Sustainable Cities and Communities (11)
12. Responsible Consumption and Production (12)
13. Climate Action (13)
14. Life below Water (14)
15. Life on Land (15)
16. Peace, Justice and Strong Institutions (16)
17. Partnerships for the Goals (17)

Q4 To what extent are the SDGs taken into account in the following **processes** of the foundation? (not at all 1 – completely 5)

- mission statement (1)
- funding strategy (2)
- grant-making activities (3)
- public relations / communication (e.g. on website) (4)
- financial management (5)
- Human Resources Management (6)
- monitoring / evaluation (7)
- selection of partners (8)
- selection of beneficiaries (9)

Q5 How much was the **selection** of SDGs to which the foundation contributes guided by (not at all 1 – completely 5)

- their prioritization on the global political agenda (1)
- their relevance for the foundation and its stakeholders (2)
- their consistency with the foundation's previous areas of activity (3)
- their strategic fit with the corporate founder's engagement (4)
- other, please specify: (5)

### **Section II: SDG 17 Partnerships for the Goals**

The SDGs explicitly highlight the importance of **cross-sector partnerships** with goal number 17 that aims to *“strengthen the means of implementation and revitalize the global partnership for sustainable development”*.

The sub-goals specify: *“Enhance the global partnership for sustainable development, complemented by multi-stakeholder partnerships that mobilize and share knowledge, expertise, technology and financial resources, to support the achievement of the sustainable development goals in all countries, in particular developing countries”* and *“Encourage and promote effective public, public-private and civil society partnerships, building on the experience and resourcing strategies of partnerships”*.

Q6 Please rate the following statement: The foundations sees itself as **initiator** of cross-sector partnerships, as demanded in Goal 17. ? (not at all 1 – completely 5)

Q7 While approaching the SDGs, the foundation established or intensified **collaboration** with the following actors (yes 1 – no 2)

- founding company (1)
- other companies (2)
- other corporate foundations (3)
- other charitable organizations (4)
- governmental bodies (5)
- other, please specify: (6)

### **Section III: Background Information: Corporate Foundation**

Q8 What **year** was the foundation established?

---

Q9 In which of the following **thematic areas** is the foundation active with at least one project? (tick all that apply)

- Culture and Recreation (1)
- Education and Research (2)
- Health (3)

- Social services (4)
- Environment (5)
- Development and Housing (6)
- Law, Advocacy and Politics (7)
- Philanthropic Intermediaries and Promotion of Voluntarism (8)
- International (9)
- Religion (10)
- Business and professional Associations, Unions (11)

Q10 Which of the following best describes the **foundation's activities**?

- Grant making (1)
- Operating own programs (2)
- Mixed (grant making & operating) (3)

Q11 Does the foundation have **operations** in at least one country outside its country of origin?

- yes (1)
- no (2)

Q12 What was the total amount (in CHF/EUR) the foundation **paid out in grants/spend for own projects** in 2019? \_\_\_\_\_

Q13 How many **employees** work for the foundation in full-time equivalent? \_\_\_\_\_

Q14 Is the foundation guided by the recommendations of the **Swiss Foundation Code/ Guiding Principles of Good Practice for Foundations** from the Association of German Foundations?

- yes (1)
- no (2)

Q15 How many **members** serve on the foundation's board? \_\_\_\_\_

**Section IV: Background Information: Founding company**

Q16 What was the **annual turnover** (in CHF/EUR) off your **founding company** in 2019?  
\_\_\_\_\_

Q17 What **industry** does your **founding company** belong to? (tick all that apply)

- Agriculture (1)
- Energy (2)
- Chemicals and Pharma (3)
- Manufacturing (4)
- Construction and Housing (5)
- Tourism (6)
- Information and Communication (7)
- Money, Banks, Insurance companies (8)
- Media (9)
- Other (10)
